# Supplementary material for: Construing the interactions between MnO2 nanoparticle and bovine serum albumin: insight into the structure and stability of a protein–nanoparticle complex
Source: Royal Society of Chemistry journal article supplement (doi:10.1039/c7nj01227f), 2017-01-01

## **Supplementary Information**

### **Construing the interactions between MnO<sub>2</sub> nanoparticle and Bovine serum albumin:**

#### **Insight into the structure and stability of protein-nanoparticle complex**

Ayonbala Baral<sup>a,b</sup>, Lakkoji Satish<sup>d</sup>, Dipti P Das<sup>a,c</sup>, Harekrushna Sahoo<sup>d\*</sup>, Malay K. Ghosh<sup>a,b\*</sup>

<sup>a</sup> Academy of Scientific and Innovative Research (AcSIR), CSIR- IMMT campus, Bhubaneswar - 751013, Odisha, India

<sup>b</sup> Hydro & Electrometallurgy Department, CSIR- Institute of Minerals and Materials Technology, Bhubaneswar - 751013, Odisha, India

<sup>c</sup> Colloids & Material Chemistry Dept., CSIR- Institute of Minerals and Materials Technology Bhubaneswar, Odisha 751013, India

<sup>d</sup> Department of Chemistry, National Institute of Technology Rourkela, Rourkela – 769008, Odisha

**Figure S1.** Absorption spectra of BSA in presence of various concentrations of MnO<sub>2</sub>(0, 0.001, 0.002, 0.006, 0.01, 0.015 and 0.02 mg/ml) at 25 °C. [“P” represents protein, BSA]

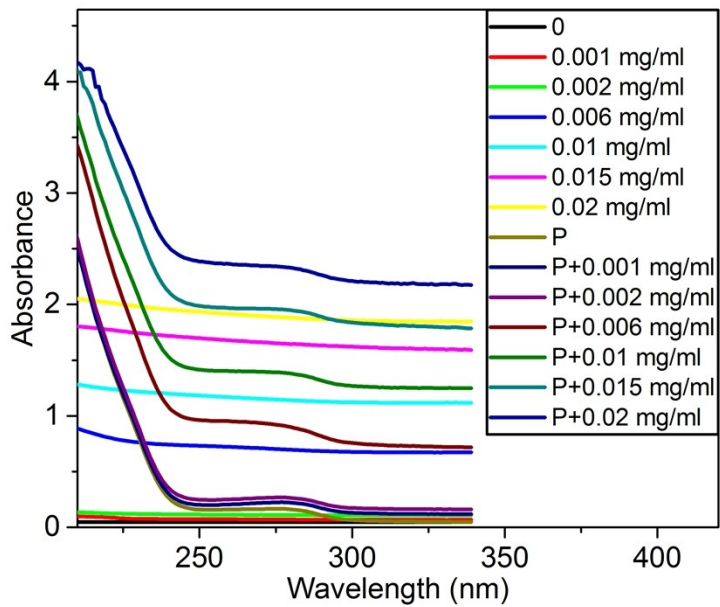

Supplement: c7nj01227f1.pdf [file c7nj01227f1.pdf]
